# Supplementary material
Source: ML conference proceedings conference paper supplement (https://proceedings.mlr.press/v189/trivedi23a.html)
Supplement: Supplementary file 1 [file trivedi23a-supp.pdf]

# Noise Robust Core-stable Coalitions of Hedonic Games Supplementary Material

**Prashant Trivedi**  
IEOR, Indian Institute of Technology Bombay

TRIVEDI.PRASHANT15@IITB.AC.IN

**Nandyala Hemachandra**  
IEOR, Indian Institute of Technology Bombay

NH@IITB.AC.IN

**Editors:** Emtiyaz Khan and Mehmet Gönen

## 1. $n$ agents 2 support partial information noise model

In a two support noise model we have  $\mathcal{N}_{sp} = \{1, \alpha\}$  with  $\alpha > 1$ , such that for any coalition  $S \subseteq N$ ,  $\mathbb{P}[\alpha(S) = \alpha] = p = 1 - \mathbb{P}[\alpha(S) = 1]$ . We derive the agreement probability,  $f_T(p, \alpha)$  in the following lemma. Note that this lemma serves as the base case in the Mathematical induction based proof of the Theorem 11 in the main paper.

**Lemma 1** *Let  $\tilde{\pi}$  be  $\tilde{\epsilon}$ -PAC stable partition of noisy game  $(N, \tilde{\mathbf{v}})$ , and let  $\tilde{\pi}$  be a  $\epsilon$ -PAC stable outcome of the noise-free game  $(N, \mathbf{v})$ , where  $\epsilon$  is identified in Theorem 5 of the paper. Then the agreement probability  $f_T(p, \alpha)$  is given by*

$$f_T(p, \alpha) = \begin{cases} 1, & \text{if } \tilde{\pi}(i) = T, \forall i \in T \\ p + (1-p)^{|\mathcal{R}(T)|+1-|\mathcal{I}(\alpha, T)|}, & \text{otherwise} \end{cases}$$

where  $\mathcal{I}(\alpha, T) = \left\{ \tilde{\pi}(i) \in \mathcal{R}(T) \mid \frac{\tilde{v}_i(\tilde{\pi}(i))}{\tilde{v}_i(T)} \geq \alpha \right\}$ .

**Proof** Recall from Theorem 5 in main paper we have the following

$$\mathbb{P}_{T \sim \tilde{\mathcal{D}}}[\bigcup_{i \in T} v_i(\tilde{\pi}(i)) \geq v_i(T)] \geq (1 - \tilde{\epsilon})f_T(\mathbf{p}, \boldsymbol{\alpha}).$$

Also, recall that the agreement event is defined as

$$M(\tilde{\pi}, T) := \{(\{\alpha(\tilde{\pi}(i))\}_{\tilde{\pi}(i) \in \mathcal{R}(T)}, \alpha(T)) : \bigcap_{i \in T} \{v_i(\tilde{\pi}(i)) \geq v_i(T) \cap \alpha(\tilde{\pi}(i))v_i(\tilde{\pi}(i)) \geq \alpha(T)v_i(T)\}\},$$

and  $f_T(p, \alpha) = \mathbb{P}[M(\tilde{\pi}, T)]$  is the probability of agreement event. Moreover,

$$\mathcal{R}(T) := \{\tilde{\pi}(i) \mid i \in T\}; \quad \mathcal{I}(\alpha, T) = \left\{ \tilde{\pi}(i) \in \mathcal{R}(T) \mid \frac{\tilde{v}_i(\tilde{\pi}(i))}{\tilde{v}_i(T)} \geq \alpha \right\}.$$

To find the agreement probability,  $f_T(\mathbf{p}, \boldsymbol{\alpha})$  we consider two cases  $\mathcal{I}(\alpha, T) = \emptyset$ , and  $\mathcal{I}(\alpha, T) \neq \emptyset$ . For these cases we identify the possible noise values  $\{\alpha(\tilde{\pi}(i))\}_{\tilde{\pi}(i) \in \mathcal{R}(T)}, \alpha(T)$  that are element of  $M(\tilde{\pi}, T)$ .

- **Case 01:**  $[\mathcal{I}(\alpha, T) = \emptyset]$ . In this case, we have following elements in  $M(\tilde{\pi}, T)$ .

- $\alpha(\tilde{\pi}(i)) = 1, \forall \tilde{\pi}(i) \in \mathcal{R}(T)$  and  $\alpha(T) = 1$ . The probability of such choice of  $\alpha$ 's is

$$(1-p)^{|\mathcal{R}(T)|+1}. \quad (1)$$

- $\alpha(\tilde{\pi}(i)) = \alpha$  for **exactly one**  $\tilde{\pi}(i) \in \mathcal{R}(T)$ , and  $\alpha(\tilde{\pi}(i)) = 1$  for remaining coalitions in  $\mathcal{R}(T)$ , and  $\alpha(T) = \alpha$ . Probability of such choice of  $\alpha$ 's is  $(p \times (1-p)^{|\mathcal{R}(T)|-1}) \times p$ . And there are  $\binom{|\mathcal{R}(T)|}{1}$  ways of selecting **exactly one** coalition  $\tilde{\pi}(i) \in \mathcal{R}(T)$ . Thus, the probability of above  $\alpha$ 's is  $\binom{|\mathcal{R}(T)|}{1} p(1-p)^{|\mathcal{R}(T)|-1} p$ .

In general, for any  $k \in \{0, 1, \dots, |\mathcal{R}(T)|\}$  coalitions  $\tilde{\pi}(i) \in \mathcal{R}(T)$ , take  $\alpha(\tilde{\pi}(i)) = \alpha$ . Moreover,  $\alpha(\tilde{\pi}(i)) = 1$  for remaining  $|\mathcal{R}(T)| - k$  coalitions and take  $\alpha(T) = \alpha$ . Further, we have  $\binom{|\mathcal{R}(T)|}{k}$  similar choices. So, the probability of the above choice of  $\alpha$ 's is

$$\begin{aligned} \sum_{k=0}^{|\mathcal{R}(T)|} \left\{ \binom{|\mathcal{R}(T)|}{k} p^k (1-p)^{|\mathcal{R}(T)|-k} \right\} \times p &= p \times \left( \sum_{k=0}^{|\mathcal{R}(T)|} \binom{|\mathcal{R}(T)|}{k} p^k (1-p)^{|\mathcal{R}(T)|-k} \right) \\ &= p. \end{aligned} \quad (2)$$

This is because for any coalition  $S$ , we have  $\mathbb{P}[\alpha(S) = \alpha] = p = 1 - \mathbb{P}[\alpha(S) = 1]$  and the fact that binomial probabilities summed up to 1.

- **Case 02:**  $[\mathcal{I}(\alpha, T) \neq \emptyset]$ . Then, in addition to the above possible cases, we will have a few other cases, which are:

- $\alpha(\tilde{\pi}(i)) = \alpha$  for **exactly one**  $\tilde{\pi}(i) \in \mathcal{I}(\alpha, T)$ ,  $\alpha(\tilde{\pi}(i)) = 1$  for remaining coalitions in  $\mathcal{R}(T)$  and  $\alpha(T) = 1$ . Probability of such choice of  $\alpha$ 's is  $p(1-p)^{|\mathcal{R}(T)|-1}(1-p) = p(1-p)^{|\mathcal{R}(T)|}$ . And there are  $\binom{|\mathcal{I}(\alpha, T)|}{1}$  ways of choosing **exactly one** coalition  $\tilde{\pi}(i) \in \mathcal{I}(\alpha, T)$ . Thus the overall probability is  $\binom{|\mathcal{I}(\alpha, T)|}{1} p(1-p)^{|\mathcal{R}(T)|}$ .

In general, we have  $\alpha(\tilde{\pi}(i)) = \alpha$  for any  $k \in \{1, 2, \dots, |\mathcal{I}(\alpha, T)|\}$  coalitions  $\tilde{\pi}(i) \in \mathcal{I}(\alpha, T)$ . Moreover,  $\alpha(\tilde{\pi}(i)) = 1$  for remaining  $|\mathcal{R}(T)| - k$  coalitions, and  $\alpha(T) = 1$ . Probability of such choice of  $\alpha$ 's is  $p^k (1-p)^{|\mathcal{R}(T)|-|\mathcal{I}(\alpha, T)|} (1-p)$ . And there are  $\binom{|\mathcal{I}(\alpha, T)|}{k}$  ways of selecting  $k$  coalitions  $\tilde{\pi}(i) \in \mathcal{I}(\alpha, T)$ . Thus the overall probability is

$$\sum_{k=1}^{|\mathcal{I}(\alpha, T)|} \binom{|\mathcal{I}(\alpha, T)|}{k} p^k (1-p)^{|\mathcal{R}(T)|-|\mathcal{I}(\alpha, T)|} (1-p). \quad (3)$$

The probability of event  $M(\tilde{\pi}, T)$ , i.e.,  $\mathbb{P}[M(\tilde{\pi}, T)]$  is obtained by adding probabilities given in Equations (1), (2) and (3).

$$\begin{aligned} \mathbb{P}[M(\tilde{\pi}, T)] &= (1-p)^{|\mathcal{R}(T)|+1} + p + \sum_{k=1}^{|\mathcal{I}(\alpha, T)|} \binom{|\mathcal{I}(\alpha, T)|}{k} p^k (1-p)^{|\mathcal{R}(T)|-|\mathcal{I}(\alpha, T)|} (1-p) \\ &= (1-p)^{|\mathcal{R}(T)|+1} + p + (1-p)^{|\mathcal{R}(T)|-|\mathcal{I}(\alpha, T)|+1} \left[ 1 - (1-p)^{|\mathcal{I}(\alpha, T)|} \right] \end{aligned}$$

$$= p + (1 - p)^{|\mathcal{R}(T)| - |\mathcal{I}(\alpha, T)| + 1}.$$

This ends the proof. ■

If  $\tilde{\pi}(i) \neq T$  for at least one  $i \in T$ , then  $f_T(p, \alpha) = 1$ ,  $\forall \alpha$  if and only if  $p = 0$  or  $p = 1$ . That is, if the value of all the coalitions are retained, or if values of all of them are inflated by  $\alpha$ , then for all  $i \in T$ , and for all  $\tilde{\pi}(i) \in \mathcal{R}(T)$ , one has  $\tilde{\pi}(i) \succeq_i T$ , and  $\tilde{\pi}(i) \succeq'_i T$ . Thus,  $\tilde{\pi}$  is  $\epsilon$ -PAC stable outcome of *unknown noise-free* game and hence  $\tilde{\pi}$  is noise-robust.

**Corollary 2** *When  $\tilde{\pi} = N$ , i.e., the grand coalition is  $\tilde{\epsilon}$ -PAC stable outcome in the noisy game, then  $\mathcal{R}(T) = \{N\}$  for any coalition  $T$ . Thus,  $\mathcal{I}(\alpha, T) = \emptyset$ , or  $\mathcal{I}(\alpha, T) = \{N\}$ . Therefore,  $f_T(p, \alpha)$  simplifies to*

$$f_T(p, \alpha) = \begin{cases} 1, & \text{if } \mathcal{I}(\alpha, T) = \{N\} \\ (1 - p)^2 + p, & \text{if } \mathcal{I}(\alpha, T) = \emptyset. \end{cases} \quad (4)$$

## 2. $n$ agents 2 support partial information noisy games without core

Suppose  $\tilde{\pi}$  is not  $\tilde{\epsilon}$ -PAC stable partition for the noisy game  $(N, \tilde{\mathbf{v}})$ . Moreover, let the noise support be  $\mathcal{N}_{sp} = \{1, \alpha\}$ , the following lemma provides the expression of  $h_T(p, \alpha)$ . Note that this lemma serves as the base case for the Mathematical induction based proof of Theorem 15 in the main paper.

**Lemma 3** *Suppose  $\tilde{\pi}$  is not a  $\tilde{\epsilon}$ -PAC stable outcome of the noisy game  $(N, \tilde{\mathbf{v}})$ , then the agreement probability  $h_T(p, \alpha)$  for noise support  $\mathcal{N}_{sp} \in \{1, \alpha\}$  is given by*

$$h_T(p, \alpha) = \begin{cases} 1, & \text{if } \tilde{\pi}(i) = T, \forall i \in T \\ (1 - p) + p^{|\mathcal{R}(T)| + 1 - |\mathcal{J}(\alpha, T)|}, & \text{otherwise,} \end{cases} \quad (5)$$

where  $\mathcal{J}(\alpha, T) := \left\{ \tilde{\pi}(i) \in \mathcal{R}(T) \mid \frac{\tilde{v}_i(\tilde{\pi}(i))}{\tilde{v}_i(T)} \geq \frac{1}{\alpha} \right\}$ .

**Proof** From Theorem 13 of the main paper, we have the following

$$\mathbb{P}[\cup_{i \in T} v_i(\tilde{\pi}(i)) \geq v_i(T)] \geq (1 - \tilde{\epsilon})h_T(p, \alpha).$$

To get  $h_T(p, \alpha) := \mathbb{P}[F(T, \tilde{\pi})]$  we consider two cases viz.  $\mathcal{J}(\alpha, T) = \emptyset$ , and  $\mathcal{J}(\alpha, T) \neq \emptyset$ . For these cases, we identify the possible noise values elements of  $F(T, \tilde{\pi})$ .

- **Case 01:**  $[\mathcal{J}(\alpha, T) = \emptyset]$ . In this case, we have the following possibilities:

- $\alpha(\tilde{\pi}(i)) = \alpha$ ,  $\forall \tilde{\pi}(i) \in \mathcal{R}(T)$ , and  $\alpha(T) = \alpha$ . Probability of such a choice of  $\alpha$ 's is
 
$$p^{|\mathcal{R}(T)| + 1}. \quad (6)$$

- $\alpha(\tilde{\pi}(i)) = 1$  for  $k \in \{0, 1, \dots, |\mathcal{R}(T)|\}$  coalitions  $\tilde{\pi}(i) \in \mathcal{R}(T)$ , and  $\alpha(\tilde{\pi}(i)) = \alpha$  for remaining  $|\mathcal{R}(T)| - k$  coalitions. Moreover,  $\alpha(T) = 1$ . Probability of such choice of  $\alpha$ 's is  $(1-p)^k p^{|\mathcal{R}(T)|-k} (1-p)$ . Further, there are  $\binom{|\mathcal{R}(T)|}{k}$  ways of selecting  $k$  coalitions  $\tilde{\pi}(i)$  from  $\mathcal{R}(T)$ . Thus, the overall probability is

$$\sum_{k=0}^{|\mathcal{R}(T)|} \binom{|\mathcal{R}(T)|}{k} (1-p)^k p^{|\mathcal{R}(T)|-k} (1-p) = 1-p. \quad (7)$$

- **Case 02:**  $[\mathcal{J}(\alpha, T) \neq \emptyset]$ . In addition to the above possible cases, we have a few other cases:

- $\alpha(\tilde{\pi}(i)) = 1$  for any  $k \in \{1, 2, \dots, |\mathcal{J}(\alpha, T)|\}$  coalitions  $\tilde{\pi}(i) \in \mathcal{J}(\alpha, T)$ . Moreover,  $\alpha(\tilde{\pi}(i)) = \alpha$  for remaining coalitions in  $\mathcal{R}(T)$ . Also,  $\alpha(T) = \alpha$ . Probability of such choice of  $\alpha$ 's is  $(1-p)^k p^{|\mathcal{R}(T)|-k} p = (1-p)^k p^{|\mathcal{R}(T)|-k+1}$ . And there are  $\binom{|\mathcal{J}(\alpha, T)|}{k}$  ways of selecting  $k$  coalitions  $\tilde{\pi}(i) \in \mathcal{J}(\alpha, T)$ . Thus the overall probability is

$$\sum_{k=1}^{|\mathcal{J}(\alpha, T)|} \binom{|\mathcal{J}(\alpha, T)|}{k} (1-p)^k p^{|\mathcal{R}(T)|-k+1}. \quad (8)$$

The probability  $\mathbb{P}[F(T, \tilde{\pi})]$  is obtained by adding probabilities given in Equations (6), (7) and (8).

$$\begin{aligned} \mathbb{P}[F(T, \tilde{\pi})] &= p^{|\mathcal{R}(T)|+1} + (1-p) + \sum_{k=1}^{|\mathcal{J}(\alpha, T)|} \binom{|\mathcal{J}(\alpha, T)|}{k} (1-p)^k p^{|\mathcal{R}(T)|-k+1} \\ &= p^{|\mathcal{R}(T)|+1} + (1-p) + p^{|\mathcal{R}(T)|-|\mathcal{J}(\alpha, T)|+1} \left[ 1 - p^{|\mathcal{J}(\alpha, T)|} \right] \\ &= (1-p) + p^{|\mathcal{R}(T)|-|\mathcal{J}(\alpha, T)|+1}. \end{aligned}$$

This ends the proof. ■

If  $\tilde{\pi}(i) \neq T$  for at least one  $i \in T$ , then  $h_T(p, \alpha) = 1$ ,  $\forall \alpha$  if  $p = 0$  or  $p = 1$ . That is, if the value of all coalitions are retained, or if value of all of them are inflated by  $\alpha$ , then coalition  $T \succeq_i \tilde{\pi}(i)$ , and  $T \succeq'_i \tilde{\pi}(i)$  for all  $i \in T$ . Thus, neither noise-free nor noisy game will have  $\tilde{\pi}$  as PAC stable outcome. Moreover, if we allow  $h_T(p, \alpha) = \eta$  for some user-given satisfaction  $\eta$ , we get a noise set in accordance to the Remark 14 in the main paper. In this case, the noise set also depends on  $|\mathcal{R}(T)|$ , and  $|\mathcal{J}(\alpha, T)|$  for coalition  $T$ . Hence, the partition is  $\eta$  noise-robust non core-stable for the noise set  $I^*(T, \eta)$ .

### 3. Proof of Theorem 15 of main paper

**Theorem:** For  $n$  agent noisy hedonic game  $(N, \tilde{v})$  with  $\mathcal{N}_{sp} = \{\alpha_1, \alpha_2, \dots, \alpha_l\}$ , the agreement probability  $h_T(\mathbf{p}, \boldsymbol{\alpha})$  is given by:

$$h_T(\mathbf{p}, \boldsymbol{\alpha}) = \begin{cases} 1, & \text{if } \tilde{\pi}(i) = T, \forall i \in T, \\ \sum_{r,s \in [l]: \alpha_r > \alpha_s} p_r^{|\mathcal{R}(T)| - |\mathcal{J}(\alpha_r, \alpha_s, T)| + 1} \times \{(p_s + p_r)^{|\mathcal{J}(\alpha_r, \alpha_s, T)|} - p_r^{|\mathcal{J}(\alpha_r, \alpha_s, T)|}\} \\ + \sum_{a=1}^l p_a \left( \sum_{b=a}^l p_b \right)^{|\mathcal{R}(T)|}, & \text{otherwise.} \end{cases}$$

**Proof** We will prove this via Mathematical induction on the noise support  $l \geq 2$ . Clearly, this is true for  $l = 2$  (from Lemma 3 above). Let us assume that it is true for  $l = k$ , i.e.; there are sets

$$\mathcal{J}(\alpha_r, \alpha_s, T) = \left\{ \tilde{\pi}(i) \in \mathcal{R}(T) \mid \frac{\tilde{v}_i(\tilde{\pi}(i))}{\tilde{v}_i(T)} \geq \frac{\alpha_s}{\alpha_r} \right\},$$

such that the support  $\alpha(S) = \{\alpha_1, \dots, \alpha_k\}$ ,  $\forall S \subseteq N$  where  $\alpha_s < \alpha_r$ ,  $\forall 1 \leq s < r \leq k$ . For this  $k$  we have  $f_T(p_j, \alpha_j : j \in [k]) =: h_T(\mathbf{p}, \boldsymbol{\alpha})$  (by assumption)

$$h_T(\mathbf{p}, \boldsymbol{\alpha}) = \sum_{a=1}^k p_a \left( \sum_{b=a}^k p_b \right)^{|\mathcal{R}(T)|} + \sum_{r,s \in [k]: \alpha_r > \alpha_s} p_r^{|\mathcal{R}(T)| - |\mathcal{J}(\alpha_r, \alpha_s, T)| + 1} ((p_r + p_s)^{|\mathcal{J}(\alpha_r, \alpha_s, T)|} - p_r^{|\mathcal{J}(\alpha_r, \alpha_s, T)|}).$$

We will now show that this is true for  $l = k + 1$ . To this end define  $\mathcal{J}(\alpha_{k+1}, \alpha_s, T)$  for all  $s \in [k]$  such that  $\alpha_{k+1} > \alpha_s$

$$\mathcal{J}(\alpha_{k+1}, \alpha_s, T) = \left\{ \tilde{\pi}(i) \in \mathcal{R}(T) \mid \frac{\tilde{v}_i(\tilde{\pi}(i))}{\tilde{v}_i(T)} \geq \frac{\alpha_s}{\alpha_{k+1}} \right\}.$$

Now, there are two cases,  $\mathcal{J}(\alpha_{k+1}, \alpha_s, T) = \emptyset$ ,  $\forall \alpha_s, s \in [k]$ , or  $\mathcal{J}(\alpha_{k+1}, \alpha_s, T) \neq \emptyset$  for at least for one  $s \in [k]$ .

**Case 01:**  $[\mathcal{J}(\alpha_{k+1}, \alpha_s, T) = \emptyset, \forall \alpha_s, s \in [k]]$ . Apart from the existing  $\{\alpha(\tilde{\pi}(i))\}_{\tilde{\pi}(i) \in \mathcal{R}(T)}$  and  $\alpha(T)$  for  $k$  support case, with this extra  $k + 1$ , it will also have  $\alpha(T) = \alpha_{k+1}$  and  $\alpha(\tilde{\pi}(i)) = \alpha_{k+1}$ ,  $\forall \tilde{\pi}(i) \in \mathcal{R}(T)$ . The probability of such extra  $\alpha$ 's is  $p_{k+1} \left( \sum_{b=k+1}^{k+1} p_b \right)^{|\mathcal{R}(T)|}$ . Therefore, the overall probability is

$$\sum_{a=1}^k p_a \left( \sum_{b=a}^k p_b \right)^{|\mathcal{R}(T)|} + p_{k+1} \left( \sum_{b=k+1}^{k+1} p_b \right)^{|\mathcal{R}(T)|} = \sum_{a=1}^{k+1} p_a \left( \sum_{b=a}^{k+1} p_b \right)^{|\mathcal{R}(T)|}.$$

**Case 02:**  $[\mathcal{J}(\alpha_{k+1}, \alpha_s, T) \neq \emptyset \text{ for at least one } s \in [k]]$ . In this case, apart from all  $\alpha(T)$  and  $\{\alpha(\tilde{\pi}(i))\}_{\tilde{\pi}(i) \in \mathcal{J}(\alpha_r, \alpha_s, T)}$ , we have  $\{\alpha(\tilde{\pi}(i))\}_{\forall \tilde{\pi}(i) \in \mathcal{J}(\alpha_{k+1}, \alpha_r, T), \alpha(T)}$ . For this set, the possible pairs are such that  $\alpha(\tilde{\pi}(i)) = \alpha_r$ ,  $\forall \tilde{\pi}(i) \in \mathcal{R}(T) \setminus \mathcal{J}(\alpha_{k+1}, \alpha_r, T)$ , and  $\alpha(T) = \alpha_{k+1}$ . Thus, their combined probability is  $p_{k+1}^{|\mathcal{R}(T)| - |\mathcal{J}(\alpha_{k+1}, \alpha_s, T)| + 1} ((p_{k+1} - p_s)^{|\mathcal{J}(\alpha_{k+1}, \alpha_r, T)|} - p_{k+1}^{|\mathcal{J}(\alpha_{k+1}, \alpha_r, T)|})$ . Hence for  $k + 1$  support, the probability is

$$\sum_{r,s \in [k]: \alpha_r > \alpha_s} p_r^{|\mathcal{R}(T)| - |\mathcal{J}(\alpha_r, \alpha_r, T)| + 1} ((p_r + p_s)^{|\mathcal{J}(\alpha_r, \alpha_s, T)|} - p_r^{|\mathcal{J}(\alpha_r, \alpha_s, T)|})$$

$$+ p_{k+1}^{|\mathcal{R}(T)|-|\mathcal{J}(\alpha_{k+1},\alpha_s,T)|+1} \left( (p_{k+1} + p_s)^{|\mathcal{I}(\alpha_{k+1},\alpha_s,T)|} - p_{k+1}^{|\mathcal{J}(\alpha_{k+1},\alpha_s,T)|} \right).$$

From case 01 and case 02 with  $k + 1$  support, we have

$$\begin{aligned} h_T(p_j, \alpha_j; j \in [k + 1]) &= \sum_{r,s \in [k+1]; \alpha_r > \alpha_s} p_r^{|\mathcal{R}(T)|-|\mathcal{J}(\alpha_r,\alpha_s,T)|+1} \left( (p_r + p_s)^{|\mathcal{J}(\alpha_r,\alpha_s,T)|} - p_r^{|\mathcal{J}(\alpha_r,\alpha_s,T)|} \right) \\ &\quad + \sum_{a=1}^{k+1} p_a \left( \sum_{b=a}^{k+1} p_b \right)^{|\mathcal{R}(T)|}. \end{aligned}$$

Furthermore, it is true for  $k + 1$  support. Thus, from the principle of Mathematical induction, this is true for any  $l \geq 2$ .  $\blacksquare$

## 4. 2 agent 2 support model

In this Section, we will provide further details about the 2 agents' full information noisy game with 2 support of the noise distribution. First, we consider the following noisy game.

$$\tilde{v}_1(12) > \tilde{v}_1(1); \quad \tilde{v}_2(12) > \tilde{v}_2(2). \quad (\text{game 1})$$

We also consider the other possible noisy games with 2 agents in later subsections.

### 4.1. Proof of Lemma 18 of main paper

**Lemma:** For noisy [game 1](#) with complete information on  $\tilde{v}$  and  $\mathcal{N}_{sp} = \{1, \alpha\}$  we have

$$\mathbb{P}[\pi = \tilde{\pi} \mid \text{game 1}] = \begin{cases} 1 - p(1 - p^2), & \text{if } \alpha \geq \bar{r} \\ 1 - p(1 - p), & \text{if } \underline{r} \leq \alpha < \bar{r} \\ 1, & \text{if } \alpha < \underline{r}, \end{cases} \quad (9)$$

where  $\bar{r} = \max \left\{ \frac{\tilde{v}_1(12)}{\tilde{v}_1(1)}, \frac{\tilde{v}_2(12)}{\tilde{v}_2(2)} \right\}$ , and  $\underline{r} = \min \left\{ \frac{\tilde{v}_1(12)}{\tilde{v}_1(1)}, \frac{\tilde{v}_2(12)}{\tilde{v}_2(2)} \right\}$ .

Also, this prediction probability  $\mathbb{P}[\pi = \tilde{\pi} \mid \text{game 1}]$  is convex in  $p$ . So, while the minimal value for  $\mathbb{P}[\pi = \tilde{\pi} \mid \text{game 1}]$  occurs for noise probabilities around  $p = 0.5$  (depending on  $\alpha, \bar{r}$  and  $\underline{r}$ ), the maximal value of it is 1 at  $p = 0$  and  $p = 1$ .

**Proof** For noisy [game 1](#), we have  $\tilde{\pi} = N$ . Now, consider the noise support  $\mathcal{N}_{sp} = \{1, \alpha\}$ , where  $\alpha > 1$  such that  $\mathbb{P}[\alpha(S) = \alpha] = p = 1 - \mathbb{P}[\alpha(S) = 1]$ , for some fixed and unknown  $p$ . Given noisy [game 1](#), there are 8 possible combinations of  $\alpha$ 's (because each coalition has two options). We will now enumerate all such possibilities:

1.  $\alpha(1) = 1; \alpha(2) = 1; \alpha(12) = 1$ . The probability of such alpha is  $(1 - p)^3$ . Thus, the noise-free values are  $v_1(1) = \tilde{v}_1(1); v_2(2) = \tilde{v}_2(2), v_1(12) = \tilde{v}_1(12)$  and  $v_2(12) = \tilde{v}_2(12)$ . Therefore, The noise-free game is:

$$v_1(12) > v_1(1); \quad v_2(12) > v_2(2).$$

From this game we have  $\pi = \tilde{\pi} = N$ .

2.  $\alpha(1) = 1; \alpha(2) = 1; \alpha(12) = \alpha$  Probability of such alpha's is  $p(1-p)^2$ . Thus the actual values are  $v_1(1) = \tilde{v}_1(1); v_2(2) = \tilde{v}_2(2), v_1(12) = \frac{\tilde{v}_1(12)}{\alpha}$  and  $v_2(12) = \frac{\tilde{v}_2(12)}{\alpha}$ . Therefore, the actual preferences will depend on the relative values of  $\alpha$  and  $\tilde{v}$ . If  $\alpha$  and  $\tilde{v}$ 's are such that  $\frac{\tilde{v}_1(12)}{\alpha} > \tilde{v}_1(1)$  and  $\frac{\tilde{v}_2(12)}{\alpha} > \tilde{v}_2(2)$ , then  $\pi = N$ , otherwise  $\pi = \{\{1\}, \{2\}\}$ .

3.  $\alpha(1) = 1; \alpha(2) = \alpha; \alpha(12) = 1$ . The probability of such alpha is  $p(1-p)^2$ . Thus, the actual values are  $v_1(1) = \tilde{v}_1(1); v_2(2) = \frac{\tilde{v}_2(2)}{\alpha}, v_1(12) = \tilde{v}_1(12)$  and  $v_2(12) = \tilde{v}_2(12)$ . Since,  $\tilde{v}_2(12) > \tilde{v}_2(2) > \frac{\tilde{v}_2(2)}{\alpha}$ . The noise-free game is:

$$v_1(12) > v_1(1); v_2(12) > v_2(2).$$

So, we have  $\pi = \tilde{\pi} = N$ .

4.  $\alpha(1) = \alpha; \alpha(2) = 1; \alpha(12) = 1$ . Probability of such alpha's is  $p(1-p)^2$ . Thus, the actual values are  $v_1(1) = \frac{\tilde{v}_1(1)}{\alpha}; v_2(2) = \tilde{v}_2(2), v_1(12) = \tilde{v}_1(12)$  and  $v_2(12) = \tilde{v}_2(12)$ . Since,  $\tilde{v}_1(12) > \tilde{v}_1(1) > \frac{\tilde{v}_1(1)}{\alpha}$ . Therefore The noise-free game is:

$$v_1(12) > v_1(1); v_2(12) > v_2(2).$$

From this game we have  $\pi = \tilde{\pi} = N$ .

5.  $\alpha(1) = 1; \alpha(2) = \alpha; \alpha(12) = \alpha$ . The probability of this alpha is  $p^2(1-p)$ . Thus, the actual values are  $v_1(1) = \tilde{v}_1(1); v_2(2) = \frac{\tilde{v}_2(2)}{\alpha}, v_1(12) = \frac{\tilde{v}_1(12)}{\alpha}$  and  $v_2(12) = \frac{\tilde{v}_2(12)}{\alpha}$ . The actual preferences will depend on the relative values of  $\alpha$  and  $\tilde{v}$ . If  $\alpha$  and  $\tilde{v}$ 's are such that  $\frac{\tilde{v}_1(12)}{\alpha} > \tilde{v}_1(1)$ , then  $\pi = N$ , otherwise  $\pi = \{\{1\}, \{2\}\}$ .

6.  $\alpha(1) = \alpha; \alpha(2) = 1; \alpha(12) = \alpha$ . The probability of such alpha is  $p^2(1-p)$ . Thus, the actual values are  $v_1(1) = \frac{\tilde{v}_1(1)}{\alpha}, v_2(2) = \tilde{v}_2(2); v_1(12) = \frac{\tilde{v}_1(12)}{\alpha}$  and  $v_2(12) = \frac{\tilde{v}_2(12)}{\alpha}$ . The actual preferences will depend on the relative values of  $\alpha$  and  $\tilde{v}$ . If  $\alpha$  and  $\tilde{v}$ 's are such that  $\frac{\tilde{v}_2(12)}{\alpha} > \tilde{v}_2(2)$ , then  $\pi = N$  otherwise  $\pi = \{\{1\}, \{2\}\}$ .

7.  $\alpha(1) = \alpha; \alpha(2) = \alpha; \alpha(12) = 1$ . Probability of such alpha's is  $p^2(1-p)$ . Thus, the actual values are  $v_1(1) = \frac{\tilde{v}_1(1)}{\alpha}, v_2(2) = \frac{\tilde{v}_2(2)}{\alpha}; v_1(12) = \tilde{v}_1(12)$  and  $v_2(12) = \tilde{v}_2(12)$ . Since,  $\tilde{v}_1(12) > \tilde{v}_1(1) > \frac{\tilde{v}_1(1)}{\alpha}$ . and,  $\tilde{v}_2(12) > \tilde{v}_2(2) > \frac{\tilde{v}_2(2)}{\alpha}$ . The noise-free game is:

$$v_1(12) > v_1(1); v_2(12) > v_2(2).$$

From this game we have  $\pi = \tilde{\pi} = N$ .

8.  $\alpha(1) = \alpha; \alpha(2) = \alpha; \alpha(12) = \alpha$ . The probability of such alpha is  $p^3$ . Thus, the actual values are  $v_1(1) = \frac{\tilde{v}_1(1)}{\alpha}, v_2(2) = \frac{\tilde{v}_2(2)}{\alpha}; v_1(12) = \frac{\tilde{v}_1(12)}{\alpha}$  and  $v_2(12) = \frac{\tilde{v}_2(12)}{\alpha}$ . Therefore, the noise-free game is:

$$v_1(12) > v_1(1); v_2(12) > v_2(2).$$

From this game it is clear that  $\pi = \tilde{\pi} = N$ .

Recall,  $\bar{r} = \max \left\{ \frac{\tilde{v}_1(12)}{\tilde{v}_1(1)}, \frac{\tilde{v}_2(12)}{\tilde{v}_2(2)} \right\}$ , and  $\underline{r} = \min \left\{ \frac{\tilde{v}_1(12)}{\tilde{v}_1(1)}, \frac{\tilde{v}_2(12)}{\tilde{v}_2(2)} \right\}$ . Out of 8 cases there are 5 cases (case 1,3,4,7,8) in which the grand coalition  $\pi = \tilde{\pi} = N$  is formed in noise-free game. In these conditions, the relative value of  $\tilde{v}_1(\cdot), \tilde{v}_2(\cdot)$  should satisfy  $\alpha \geq \bar{r}$ , and this constitute the first expression  $p^3 + p^2(1-p) + 2p(1-p)^2 + (1-p)^3$  of  $\mathbb{P}[\pi = \tilde{\pi} \mid \text{game 1}]$ . Apart from this, if the inflation interval is  $\underline{r} \leq \alpha < \bar{r}$ , then  $\pi = \tilde{\pi} = N$  is also possible from case (6) with probability  $p^2(1-p)$ . Thus,  $p^2(1-p)$  will be added to the above prediction probability. So, we have  $\mathbb{P}[\pi = \tilde{\pi} \mid \text{game 1}]$  corresponding to it. Moreover, finally, if  $\alpha < \underline{r}$ , all cases are allowable, and hence the grand coalition will always form in the noise-free game. Thus,

$$\mathbb{P}[\pi = \tilde{\pi} \mid \text{game 1}] = \begin{cases} p^3 + p^2(1-p) + 2p(1-p)^2 + (1-p)^3, & \text{if } \alpha \geq \bar{r} \\ p^3 + 2p^2(1-p) + 2p(1-p)^2 + (1-p)^3, & \text{if } \underline{r} \leq \alpha < \bar{r} \\ 1, & \text{if } \alpha < \underline{r}. \end{cases} \quad (10)$$

Simplifying these polynomials, we have

$$\mathbb{P}[\pi = \tilde{\pi} \mid \text{game 1}] = \begin{cases} 1 - p(1-p^2), & \text{if } \alpha \geq \bar{r} \\ 1 - p(1-p), & \text{if } \underline{r} \leq \alpha < \bar{r} \\ 1, & \text{if } \alpha < \underline{r}. \end{cases} \quad (11)$$

This ends the proof. ■

If we allow some user given satisfaction  $\zeta$  on the prediction probability, i.e.,  $\mathbb{P}[\pi = \tilde{\pi} \mid \text{game 1}] = \zeta$ , we get the following noise interval

$$I^*(\zeta = 0.9) = \begin{cases} [0, 0.101] \cup [0.946, 1], & \text{if } \alpha \geq \bar{r}; \\ [0, 0.113] \cup [0.887, 1], & \text{if } \underline{r} \leq \alpha < \bar{r} \\ 1, & \text{if } \alpha < \underline{r}. \end{cases} \quad (12)$$

## 4.2. Details of the other 2 agent noisy games

Here we will give the prediction probabilities for other possible noisy games with 2 agents and 2 noise support.

### 4.2.1. BOTH AGENTS PREFER STAYING ALONE IN NOISY GAME

As opposed to the noisy [game 1](#), in noisy [game 2](#) both agents prefer to stay alone. The noisy preferences of agents are as follows:

$$\tilde{v}_1(1) > \tilde{v}_1(12); \quad \tilde{v}_2(2) > \tilde{v}_2(12). \quad (\text{game 2})$$

Clearly  $\tilde{\pi} = \{\{1\}, \{2\}\} \neq N$  is the core-stable outcome. The following lemma provides prediction probability,  $\mathbb{P}[\pi = \tilde{\pi} \mid \text{game 2}]$  for noisy [game 2](#).

**Lemma 4** *For noisy [game 2](#) with full information of  $\tilde{v}$ 's, the prediction probability that unknown noise-free game has  $\pi = \tilde{\pi}$  as a core-stable outcome is*

$$\mathbb{P}[\pi = \tilde{\pi} \mid \text{game 2}] = \begin{cases} 1 - p^2(1-p), & \text{if } \frac{1}{\alpha} < \underline{r} \\ 1, & \text{if } \frac{1}{\alpha} \geq \underline{r}. \end{cases} \quad (13)$$



Moreover, the minimal and maximal values of above prediction probability are 0.85 (when  $p = 2/3$ ), and 1, respectively.

Similar to [game 1](#), the probability of formation of partition  $\pi = \{\{1\}, \{2\}\}$  in an *unknown* noise-free game is always more than 0.85. So, the safety value is 0.85. The prediction probability is 1 when  $\frac{1}{\alpha} \geq \underline{r}$  for any noise probability  $p$ . Moreover, for some user-given satisfaction  $\zeta$ , we obtain the corresponding  $p$  by setting  $\mathbb{P}[\pi = \{\{1\}, \{2\}\} \mid \text{game 2}] = \zeta$ . In particular, we have

$$I^*(\zeta = 0.9) = \begin{cases} [0, 0.413] \cup [0.867, 1], & \text{if } \frac{1}{\alpha} < \underline{r} \\ [0, 1], & \frac{1}{\alpha} \geq \underline{r}. \end{cases} \quad (14)$$

It is easy to see that the allowable  $p$  is larger than the interval given in Equation (12) for [game 1](#). So, the partition  $\tilde{\pi} = \{\{1\}, \{2\}\}$  is noise robust for larger number of inflation probabilities  $p$ . Again the noise set will shrink if we increase the satisfaction  $\zeta$ .

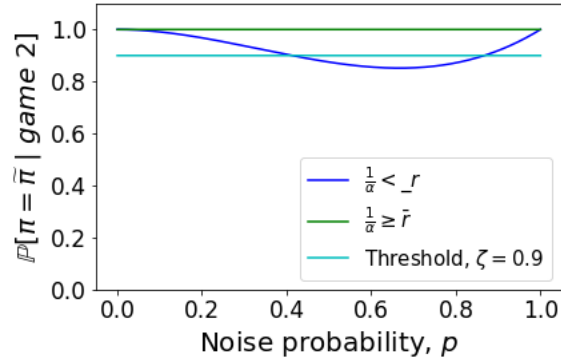

Figure 1: The prediction probability  $\mathbb{P}[\pi = \tilde{\pi} \mid \text{game 2}]$ . For  $\zeta = 0.9$ , the noise regimes are given in Equation (14).

#### 4.2.2. AGENT 1 PREFERS TO STAY ALONE AND AGENT 2 PREFERS GRAND COALITION IN NOISY GAME

Now, we consider a noisy game where agent 1 prefers to stay alone, whereas agent 2 prefers the grand coalition. In particular, the preferences in the noisy game are

$$\tilde{v}_1(1) > \tilde{v}_1(12); \quad \tilde{v}_2(12) > \tilde{v}_2(2). \quad (\text{game 3})$$

Again  $\tilde{\pi} = \{\{1\}, \{2\}\} \neq N$  is noisy core-stable outcome. The prediction probability,  $\mathbb{P}[\pi = \tilde{\pi} \mid \text{game 3}]$  is given in the Lemma below.

**Lemma 5** For noisy [game 3](#) with full information of  $\tilde{v}$ 's, the prediction probability that unknown noise-free game has  $\pi = \tilde{\pi}$  as a core-stable outcome is given by:

$$\mathbb{P}[\pi = \tilde{\pi} \mid \text{game 3}] = \begin{cases} 1 - p(1 - p), & \text{if } \frac{1}{\alpha} < \frac{\tilde{v}_1(12)}{\tilde{v}_1(1)} \\ 1, & \text{if } \frac{1}{\alpha} \geq \frac{\tilde{v}_1(12)}{\tilde{v}_1(1)}. \end{cases} \quad (15)$$

Moreover, the minimal and maximal values of above prediction probability are 0.75 (when  $p = 0.5$ ), and 1, respectively.

Similar to [game 1](#) and [game 2](#) the probability of formation of partition  $\pi = \{\{1\}, \{2\}\}$  in an *unknown* noise-free game is always more than 0.75 that is the safety value for [game 3](#). The prediction probability is 1 when  $\frac{1}{\alpha} \geq \frac{\tilde{v}_1(12)}{\tilde{v}_1(1)}$  for any noise probability  $p$ . Moreover, for some user-given satisfaction,  $\zeta$  we obtain the corresponding  $p$  by setting  $\mathbb{P}[\pi = \{\{1\}, \{2\}\} \mid \text{game 3}] = \zeta$ . In particular,

$$I^*(\zeta = 0.9) = \begin{cases} [0, 0.113] \cup [0.887, 1], & \text{if } \frac{1}{\alpha} < \frac{\tilde{v}_1(12)}{\tilde{v}_1(1)} \\ [0, 1], & \text{if } \frac{1}{\alpha} \geq \frac{\tilde{v}_1(12)}{\tilde{v}_1(1)}. \end{cases} \quad (16)$$

The following figure shows the prediction probabilities for [game 3](#).

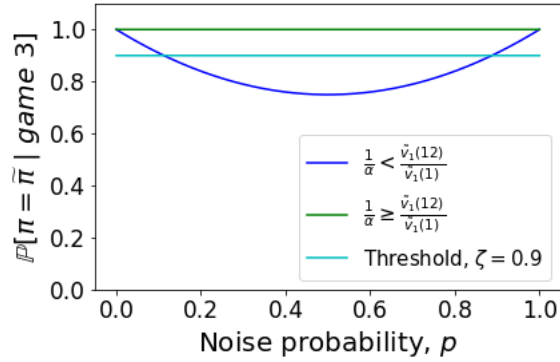

Figure 2: The prediction probability  $\mathbb{P}[\tilde{\pi} = \pi \mid \text{game 3}]$ . For  $\zeta = 0.9$ , we obtain the noise regimes as given in Equation (16).

#### 4.2.3. AGENT 1 PREFERS GRAND COALITION AND AGENT 2 PREFERS TO STAY ALONE

Finally, consider a noisy game symmetric to [game 3](#). Here agent 1 prefers a grand coalition, and agent 2 prefers to stay alone. In particular, we have the following preferences.

$$\tilde{v}_1(12) > \tilde{v}_1(1); \quad \tilde{v}_2(2) > \tilde{v}_2(12). \quad (\text{game 4})$$

Again  $\tilde{\pi} = \{\{1\}, \{2\}\} \neq N$  is a noisy core-stable outcome. In the following lemma, we find the prediction probability when noisy [game 4](#) is considered.

**Lemma 6** *For noisy [game 4](#) with full information of  $\tilde{v}$ 's, the prediction probability that noise-free game has  $\pi = \tilde{\pi}$  as as core-stable outcome is given by:*

$$\mathbb{P}[\pi = \tilde{\pi} \mid \text{game 4}] = \begin{cases} 1 - p(1 - p), & \text{if } \frac{1}{\alpha} < \frac{\tilde{v}_2(12)}{\tilde{v}_2(2)} \\ 1, & \text{if } \frac{1}{\alpha} \geq \frac{\tilde{v}_2(12)}{\tilde{v}_2(2)}. \end{cases} \quad (17)$$

So, the minimal and maximal values of above prediction probability are 0.75 (when  $p = 0.5$ ) and 1 respectively.

In this case also, the noise regime can be obtained using  $\mathbb{P}[\pi = \tilde{\pi} \mid \text{game 4}] = \zeta$ . In particular,

$$I^*(\zeta = 0.9) = \begin{cases} [0, 0.113] \cup [0.887, 1], & \text{if } \frac{1}{\alpha} < \frac{\tilde{v}_2(12)}{\tilde{v}_2(2)} \\ [0, 1], & \text{if } \frac{1}{\alpha} \geq \frac{\tilde{v}_2(12)}{\tilde{v}_2(2)}. \end{cases} \quad (18)$$

Figure 3 shows the prediction probabilities for [game 4](#).

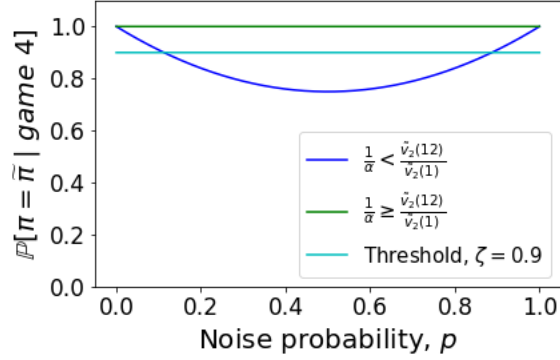

Figure 3: The prediction probability  $\mathbb{P}[\pi = \tilde{\pi} \mid \text{game 4}]$ . For  $\zeta = 0.9$ , we obtain the noise regimes as given in Equation (18).

## 5. 2 agents 3 support noise model

In this section, we consider two player noisy hedonic game with three support noise model, i.e.,  $\mathcal{N}_{sp} = \{1, \alpha_1, \alpha_2\}$ , with  $\alpha_1 > 1$ , and  $\alpha_2 < 1$ . Note that  $\alpha_1, \alpha_2 > 0$ . Let  $\mathbb{P}[\alpha(S) = \alpha_1] = p_1$ ;  $\mathbb{P}[\alpha(S) = \alpha_2] = p_2$ ; and  $\mathbb{P}[\alpha(S) = 1] = 1 - p_1 - p_2$ . That is the value of each coalition is either inflated with probability  $p_1$ , or deflated with probability  $p_2$  or retained with probability  $1 - p_1 - p_2$ . The following lemma provides the prediction probability for [game 1](#).

### 5.1. Proof of Lemma 20 of main paper

**Lemma:** For the 3 support noise model the prediction probability  $\mathbb{P}[\pi = \tilde{\pi} \mid \text{game 1}]$  is

$$\mathbb{P}[\pi = \tilde{\pi} \mid \text{game 1}] = \begin{cases} g(p_1, p_2), & \text{if } \alpha_1 \geq \bar{r} ; \frac{1}{\alpha_2} \geq \bar{r} ; \frac{\alpha_1}{\alpha_2} \geq \bar{r} \\ 1, & \text{if } \alpha_1 < \underline{r} ; \frac{1}{\alpha_2} < \underline{r} ; \frac{\alpha_1}{\alpha_2} < \underline{r} \end{cases} \quad (19)$$

where  $g(p_1, p_2) = p_1^3 + p_2^3 + 2(p_1(1 - p_1 - p_2)^2 + p_2^2(1 - p_1 - p_2) + p_1p_2(1 - p_1 - p_2) + p_1p_2^2) + p_1^2p_2 + p_1^2(1 - p_1 - p_2) + p_2(1 - p_1 - p_2)^2 + (1 - p_1 - p_2)^3$ .

**Proof** For [game 1](#), with  $l = 3$  support of noise there are 27 possible cases for  $\alpha$ 's. Since there are 3 coalitions, each coalition's value can either be retained, inflated by  $\alpha_1$ , or deflated by  $\alpha_2$ . We will now enumerate all of them:

1.  $\alpha(1) = 1; \alpha(2) = 1; \alpha(12) = 1$  Probability of such alpha's is  $(1 - p_1 - p_2)^3$ . Thus, the actual values are  $v_1(1) = \tilde{v}_1(1); v_2(2) = \tilde{v}_2(2), v_1(12) = \tilde{v}_1(12)$  and  $v_2(12) = \tilde{v}_2(12)$ . The noise-free game is:  $v_1(12) > v_1(1); v_2(12) > v_2(2)$ . So,  $\pi = \tilde{\pi}$  in this case.
2.  $\alpha(1) = 1; \alpha(2) = 1; \alpha(12) = \alpha_1$ . Probability of such alpha's is  $p_1(1 - p_1 - p_2)^2$ . Thus, the actual values are  $v_1(1) = \tilde{v}_1(1); v_2(2) = \tilde{v}_2(2), v_1(12) = \frac{\tilde{v}_1(12)}{\alpha_1}$  and  $v_2(12) = \frac{\tilde{v}_2(12)}{\alpha_1}$ . The noise-free game preferences are unclear; they will depend on the relative values of  $\alpha_1$  and  $\tilde{v}$ . If  $\alpha_1$  and  $\tilde{v}$ 's are such that  $\frac{\tilde{v}_1(12)}{\alpha_1} > \tilde{v}_1(1)$  and  $\frac{\tilde{v}_2(12)}{\alpha_1} > \tilde{v}_2(2)$  then  $\pi = N$ , otherwise  $\pi = \{\{1\}, \{2\}\}$ .
3.  $\alpha(1) = 1; \alpha(2) = \alpha_1; \alpha(12) = 1$ . Probability of such alpha's is  $p_1(1 - p_1 - p_2)^2$ . Thus, the actual values are  $v_1(1) = \tilde{v}_1(1); v_2(2) = \frac{\tilde{v}_2(2)}{\alpha_1}, v_1(12) = \tilde{v}_1(12)$  and  $v_2(12) = \tilde{v}_2(12)$ . Since  $\tilde{v}_2(12) > \tilde{v}_2(2) > \frac{\tilde{v}_2(2)}{\alpha_1}$ . The noise-free game is:  $v_1(12) > v_1(1); v_2(12) > v_2(2)$ . So,  $\pi = \tilde{\pi}$  in this case.
4.  $\alpha(1) = \alpha_1; \alpha(2) = 1; \alpha(12) = 1$ . Probability of such alpha's is  $p_1(1 - p_1 - p_2)^2$ . Thus, the actual values are  $v_1(1) = \frac{\tilde{v}_1(1)}{\alpha_1}; v_2(2) = \tilde{v}_2(2), v_1(12) = \tilde{v}_1(12)$  and  $v_2(12) = \tilde{v}_2(12)$ . Since,  $\tilde{v}_1(12) > \tilde{v}_1(1) > \frac{\tilde{v}_1(1)}{\alpha_1}$ . The noise-free game is:  $v_1(12) > v_1(1); v_2(12) > v_2(2)$ . So,  $\pi = \tilde{\pi}$  in this case.
5.  $\alpha(1) = 1; \alpha(2) = \alpha_1; \alpha(12) = \alpha_1$ . Probability of such alpha's is  $p_1^2(1 - p_1 - p_2)$ . Thus, the actual values are  $v_1(1) = \tilde{v}_1(1); v_2(2) = \frac{\tilde{v}_2(2)}{\alpha_1}, v_1(12) = \frac{\tilde{v}_1(12)}{\alpha_1}$  and  $v_2(12) = \frac{\tilde{v}_2(12)}{\alpha_1}$ . The noise-free game preferences are unclear; they will depend on the relative values of  $\alpha_1$  and  $\tilde{v}$ . If  $\alpha_1$  and  $\tilde{v}$ 's are such that  $\frac{\tilde{v}_1(12)}{\alpha_1} > \tilde{v}_1(1)$ , then  $\pi = N$ , otherwise  $\pi = \{\{1\}, \{2\}\}$ .
6.  $\alpha(1) = \alpha_1; \alpha(2) = 1; \alpha(12) = \alpha_1$ . Probability of such alpha's is  $p_1^2(1 - p_1 - p_2)$ . Thus, the actual values are  $v_1(1) = \frac{\tilde{v}_1(1)}{\alpha_1}, v_2(2) = \tilde{v}_2(2); v_1(12) = \frac{\tilde{v}_1(12)}{\alpha_1}$  and  $v_2(12) = \frac{\tilde{v}_2(12)}{\alpha_1}$ . The noise-free game preferences are unclear; they will depend on the relative values of  $\alpha_1$  and  $\tilde{v}$ . If  $\alpha_1$  and  $\tilde{v}$ 's are such that  $\frac{\tilde{v}_2(12)}{\alpha_1} > \tilde{v}_2(2)$ , then  $\pi = N$ , otherwise  $\pi = \{\{1\}, \{2\}\}$ .
7.  $\alpha(1) = \alpha_1; \alpha(2) = \alpha_1; \alpha(12) = 1$ . Probability of such alpha's is  $p_1^2(1 - p_1 - p_2)$ . Thus, the actual values are  $v_1(1) = \frac{\tilde{v}_1(1)}{\alpha_1}, v_2(2) = \frac{\tilde{v}_2(2)}{\alpha_1}; v_1(12) = \tilde{v}_1(12)$  and  $v_2(12) = \tilde{v}_2(12)$ . Since,  $\tilde{v}_1(12) > \tilde{v}_1(1) > \frac{\tilde{v}_1(1)}{\alpha_1}$ . and,  $\tilde{v}_2(12) > \tilde{v}_2(2) > \frac{\tilde{v}_2(2)}{\alpha_1}$ . The noise-free game is:  $v_1(12) > v_1(1); v_2(12) > v_2(2)$ . So,  $\pi = \tilde{\pi}$  in this case.
8.  $\alpha(1) = \alpha_1; \alpha(2) = \alpha_1; \alpha(12) = \alpha_1$ . The probability of such alpha is  $p_1^3$ . Thus, the actual values are  $v_1(1) = \frac{\tilde{v}_1(1)}{\alpha_1}, v_2(2) = \frac{\tilde{v}_2(2)}{\alpha_1}; v_1(12) = \frac{\tilde{v}_1(12)}{\alpha_1}$  and  $v_2(12) = \frac{\tilde{v}_2(12)}{\alpha_1}$ . The noise-free game is:  $v_1(12) > v_1(1); v_2(12) > v_2(2)$ . So,  $\pi = \tilde{\pi}$  in this case.
9.  $\alpha(1) = 1; \alpha(2) = 1; \alpha(12) = \alpha_2$ . Probability of such alpha's is  $p_2(1 - p_1 - p_2)^2$ . Thus, the actual values are  $v_1(1) = \tilde{v}_1(1); v_2(2) = \tilde{v}_2(2), v_1(12) = \frac{\tilde{v}_1(12)}{\alpha_2}$  and  $v_2(12) = \frac{\tilde{v}_2(12)}{\alpha_2}$ . Since  $\alpha_2 < 1$ , thus  $\frac{\tilde{v}_1(12)}{\alpha_2} > \tilde{v}_1(12) > \tilde{v}_1(1) = v_1(1)$ . Similarly,  $\frac{\tilde{v}_2(12)}{\alpha_2} > \tilde{v}_2(12) > \tilde{v}_2(2) = v_2(2)$ . The noise-free game is:  $v_1(12) > v_1(1); v_2(12) > v_2(2)$ . So,  $\pi = \tilde{\pi}$  in this case.

10.  $\alpha(1) = 1; \alpha(2) = \alpha_2; \alpha(12) = 1$ . Probability of these alpha's is  $p_2(1 - p_1 - p_2)^2$ . Thus, the actual values are  $v_1(1) = \tilde{v}_1(1); v_2(2) = \frac{\tilde{v}_2(2)}{\alpha_2}, v_1(12) = \tilde{v}_1(12)$  and  $v_2(12) = \tilde{v}_2(12)$ . The noise-free game preferences are unclear; they will depend on the relative values of  $\alpha_2$  and  $\tilde{v}$ . If  $\alpha_2$  and  $\tilde{v}$ 's are such that  $\tilde{v}_2(12) > \frac{\tilde{v}_2(2)}{\alpha_2}$  then  $\pi = N$ , otherwise  $\pi = \{\{1\}, \{2\}\}$ .
11.  $\alpha(1) = \alpha_2; \alpha(2) = 1; \alpha(12) = 1$ . Probability of such alpha's is  $p_2(1 - p_1 - p_2)^2$ . Thus, the actual values are  $v_1(1) = \frac{\tilde{v}_1(1)}{\alpha_2}; v_2(2) = \tilde{v}_2(2), v_1(12) = \tilde{v}_1(12)$  and  $v_2(12) = \tilde{v}_2(12)$ . The noise-free game preferences are unclear; they will depend on the relative values of  $\alpha_2$  and  $\tilde{v}$ . If  $\alpha_2$  and  $\tilde{v}$ 's are such that  $\tilde{v}_1(12) > \frac{\tilde{v}_1(1)}{\alpha_2}$  then  $\pi = N$ , otherwise  $\pi = \{\{1\}, \{2\}\}$ .
12.  $\alpha(1) = 1; \alpha(2) = \alpha_2; \alpha(12) = \alpha_2$ . probability of such alpha's is  $p_2^2(1 - p_1 - p_2)$ . Thus, the actual values are  $v_1(1) = \tilde{v}_1(1); v_2(2) = \frac{\tilde{v}_2(2)}{\alpha_2}, v_1(12) = \frac{\tilde{v}_1(12)}{\alpha_2}$  and  $v_2(12) = \frac{\tilde{v}_2(12)}{\alpha_2}$ . Since  $\alpha_2 < 1$ , thus  $\frac{\tilde{v}_1(12)}{\alpha_2} > \tilde{v}_1(12) > \tilde{v}_1(1) = v_1(1)$ , and  $\frac{\tilde{v}_2(12)}{\alpha_2} > \frac{\tilde{v}_2(2)}{\alpha_2}$ . The noise-free game is:  $v_1(12) > v_1(1); v_2(12) > v_2(2)$ . So,  $\pi = \tilde{\pi}$  in this case.
13.  $\alpha(1) = \alpha_2; \alpha(2) = 1; \alpha(12) = \alpha_2$ . Probability of such alpha's is  $p_2^2(1 - p_1 - p_2)$ . Thus, the actual values are  $v_1(1) = \frac{\tilde{v}_1(1)}{\alpha_2}, v_2(2) = \tilde{v}_2(2); v_1(12) = \frac{\tilde{v}_1(12)}{\alpha_2}$  and  $v_2(12) = \frac{\tilde{v}_2(12)}{\alpha_2}$ . Since  $\alpha_2 < 1$  thus  $\frac{\tilde{v}_2(12)}{\alpha_2} > \tilde{v}_2(12) > \tilde{v}_2(2) = v_2(2)$ , and  $\frac{\tilde{v}_1(12)}{\alpha_2} > \frac{\tilde{v}_1(1)}{\alpha_2}$ . The noise-free game is:  $v_1(12) > v_1(1); v_2(12) > v_2(2)$ . So,  $\pi = \tilde{\pi}$  in this case.
14.  $\alpha(1) = \alpha_2; \alpha(2) = \alpha_2; \alpha(12) = 1$ . Probability of such alpha's is  $p_2^2(1 - p_1 - p_2)$ . Thus, the actual values are  $v_1(1) = \frac{\tilde{v}_1(1)}{\alpha_2}, v_2(2) = \frac{\tilde{v}_2(2)}{\alpha_2}; v_1(12) = \tilde{v}_1(12)$  and  $v_2(12) = \tilde{v}_2(12)$ . The noise-free game preferences are unclear; they will depend on the relative values of  $\alpha_2$  and  $\tilde{v}$ . If  $\alpha_2$  and  $\tilde{v}$ 's are such that  $\tilde{v}_1(12) > \frac{\tilde{v}_1(1)}{\alpha_2}$  and  $\tilde{v}_1(12) > \frac{\tilde{v}_2(2)}{\alpha_2}$  then  $\pi = N$ , otherwise  $\pi = \{\{1\}, \{2\}\}$ .
15.  $\alpha(1) = 1; \alpha(2) = \alpha_1; \alpha(12) = \alpha_2$ . Probability of such alpha's is  $p_1 p_2(1 - p_1 - p_2)$ . Thus, the actual values are  $v_1(1) = \tilde{v}_1(1), v_2(2) = \frac{\tilde{v}_2(2)}{\alpha_1}; v_1(12) = \frac{\tilde{v}_1(12)}{\alpha_2}$  and  $v_2(12) = \frac{\tilde{v}_2(12)}{\alpha_2}$ . Since  $\frac{\tilde{v}_1(12)}{\alpha_2} > \tilde{v}_1(12) > \tilde{v}_1(1)$  and  $\frac{\tilde{v}_2(12)}{\alpha_2} > \tilde{v}_2(12) > \tilde{v}_2(2) > \frac{\tilde{v}_2(2)}{\alpha_1}$ . The noise-free game is:  $v_1(12) > v_1(1); v_2(12) > v_2(2)$ . So,  $\pi = \tilde{\pi}$  in this case.
16.  $\alpha(1) = 1; \alpha(2) = \alpha_2; \alpha(12) = \alpha_1$ . Probability of such alpha's is  $p_1 p_2(1 - p_1 - p_2)$ . Thus, actual values are  $v_1(1) = \tilde{v}_1(1), v_2(2) = \frac{\tilde{v}_2(2)}{\alpha_2}; v_1(12) = \frac{\tilde{v}_1(12)}{\alpha_1}$  and  $v_2(12) = \frac{\tilde{v}_2(12)}{\alpha_1}$ . The noise-free game preferences are unclear; it will depend on the relative values  $\alpha_1, \alpha_2$  and  $\tilde{v}$ . If  $\alpha_1, \alpha_2$  and  $\tilde{v}$ 's are such that  $\frac{\tilde{v}_1(12)}{\alpha_1} > \tilde{v}_1(1)$  and  $\frac{\tilde{v}_2(12)}{\alpha_1} > \frac{\tilde{v}_2(2)}{\alpha_2}$  then  $\pi = N$ , otherwise  $\pi = \{\{1\}, \{2\}\}$ .
17.  $\alpha(1) = \alpha_1; \alpha(2) = 1; \alpha(12) = \alpha_2$ . Probability of such alpha's is  $p_1 p_2(1 - p_1 - p_2)$ . Thus, the actual values are  $v_1(1) = \frac{\tilde{v}_1(1)}{\alpha_1}, v_2(2) = \tilde{v}_2(2); v_1(12) = \frac{\tilde{v}_1(12)}{\alpha_2}$  and  $v_2(12) = \frac{\tilde{v}_2(12)}{\alpha_2}$ . Since  $\frac{\tilde{v}_1(12)}{\alpha_2} > \tilde{v}_1(12) > \tilde{v}_1(1)$  and  $\frac{\tilde{v}_2(12)}{\alpha_2} > \tilde{v}_2(12) > \tilde{v}_2(2)$ . The noise-free game is:  $v_1(12) > v_1(1); v_2(12) > v_2(2)$ . So,  $\pi = \tilde{\pi}$  in this case.
18.  $\alpha(1) = \alpha_2; \alpha(2) = 1; \alpha(12) = \alpha_1$ . Probability of such alpha's is  $p_1 p_2(1 - p_1 - p_2)$ . Thus, the actual values are  $v_1(1) = \frac{\tilde{v}_1(1)}{\alpha_2}, v_2(2) = \tilde{v}_2(2); v_1(12) = \frac{\tilde{v}_1(12)}{\alpha_1}$  and  $v_2(12) = \frac{\tilde{v}_2(12)}{\alpha_1}$ .

The noise-free game preferences are unclear; it will depend on the relative values of  $\alpha_1$ ,  $\alpha_2$ , and  $\tilde{v}$ . If  $\alpha_1$ ,  $\alpha_2$  and  $\tilde{v}$ 's are such that  $\frac{\tilde{v}_1(12)}{\alpha_1} > \frac{\tilde{v}_1(1)}{\alpha_2}$  and  $\frac{\tilde{v}_2(12)}{\alpha_1} > \tilde{v}_2(2)$  then  $\pi = N$ , otherwise  $\pi = \{\{1\}, \{2\}\}$ .

19.  $\alpha(1) = \alpha_1; \alpha(2) = \alpha_2; \alpha(12) = 1$ . Probability of such alpha's is  $p_1 p_2 (1 - p_1 - p_2)$ . Thus, the actual values are  $v_1(1) = \frac{\tilde{v}_1(1)}{\alpha_1}$ ,  $v_2(2) = \frac{\tilde{v}_2(2)}{\alpha_2}$ ;  $v_1(12) = \tilde{v}_1(12)$  and  $v_2(12) = \tilde{v}_2(12)$ . The noise-free game preferences are unclear; it will depend on the relative values of  $\alpha_1$ ,  $\alpha_2$ , and  $\tilde{v}$ . If  $\alpha_1$ ,  $\alpha_2$  and  $\tilde{v}$ 's are such that  $\tilde{v}_2(12) > \frac{\tilde{v}_2(2)}{\alpha_2}$  then  $\pi = N$  otherwise  $\pi = \{\{1\}, \{2\}\}$ .
20.  $\alpha(1) = \alpha_2; \alpha(2) = \alpha_1; \alpha(12) = 1$ . Probability of such alpha's is  $p_1 p_2 (1 - p_1 - p_2)$ . Thus, the actual values are  $v_1(1) = \frac{\tilde{v}_1(1)}{\alpha_2}$ ,  $v_2(2) = \frac{\tilde{v}_2(2)}{\alpha_1}$ ;  $v_1(12) = \tilde{v}_1(12)$  and  $v_2(12) = \tilde{v}_2(12)$ . The noise-free game preferences are unclear; it will depend on the relative values of  $\alpha_1$ ,  $\alpha_2$ , and  $\tilde{v}$ . If  $\alpha_1$ ,  $\alpha_2$  and  $\tilde{v}$ 's are such that  $\tilde{v}_1(12) > \frac{\tilde{v}_1(1)}{\alpha_2}$  then  $\pi = N$ , otherwise  $\pi = \{\{1\}, \{2\}\}$ .
21.  $\alpha(1) = \alpha_1; \alpha(2) = \alpha_1; \alpha(12) = \alpha_2$ . Probability of such alpha's is  $p_1^2 p_2$ . Thus, the actual values are  $v_1(1) = \frac{\tilde{v}_1(1)}{\alpha_1}$ ,  $v_2(2) = \frac{\tilde{v}_2(2)}{\alpha_1}$ ;  $v_1(12) = \frac{\tilde{v}_1(12)}{\alpha_2}$  and  $v_2(12) = \frac{\tilde{v}_2(12)}{\alpha_2}$ . Since,  $\frac{\tilde{v}_1(12)}{\alpha_2} > \tilde{v}_1(12) > \tilde{v}_1(1) > \frac{\tilde{v}_1(1)}{\alpha_1}$ , and  $\frac{\tilde{v}_2(12)}{\alpha_2} > \tilde{v}_2(12) > \tilde{v}_2(2) > \frac{\tilde{v}_2(2)}{\alpha_1}$ . The noise-free game is:  $v_1(12) > v_1(1)$ ;  $v_2(12) > v_2(2)$ . So,  $\pi = \tilde{\pi}$  in this case.
22.  $\alpha(1) = \alpha_1; \alpha(2) = \alpha_2; \alpha(12) = \alpha_1$ . Probability of such alpha's is  $p_1^2 p_2$ . Thus, the actual values are  $v_1(1) = \frac{\tilde{v}_1(1)}{\alpha_1}$ ,  $v_2(2) = \frac{\tilde{v}_2(2)}{\alpha_2}$ ;  $v_1(12) = \frac{\tilde{v}_1(12)}{\alpha_1}$  and  $v_2(12) = \frac{\tilde{v}_2(12)}{\alpha_1}$ . The noise-free game preferences are unclear; it will depend on the relative values of  $\alpha_1$ ,  $\alpha_2$ , and  $\tilde{v}$ . If  $\alpha_1$ ,  $\alpha_2$  and  $\tilde{v}$ 's are such that  $\frac{\tilde{v}_2(12)}{\alpha_1} > \frac{\tilde{v}_2(2)}{\alpha_2}$  then  $\pi = N$  otherwise  $\pi = \{\{1\}, \{2\}\}$ .
23.  $\alpha(1) = \alpha_1; \alpha(2) = \alpha_2; \alpha(12) = \alpha_2$ . Probability of such alpha's is  $p_1 p_2^2$ . Thus, the actual values are  $v_1(1) = \frac{\tilde{v}_1(1)}{\alpha_1}$ ,  $v_2(2) = \frac{\tilde{v}_2(2)}{\alpha_2}$ ;  $v_1(12) = \frac{\tilde{v}_1(12)}{\alpha_2}$  and  $v_2(12) = \frac{\tilde{v}_2(12)}{\alpha_2}$ . Since,  $\frac{\tilde{v}_1(12)}{\alpha_2} > \tilde{v}_1(12) > \tilde{v}_1(1) > \frac{\tilde{v}_1(1)}{\alpha_1}$ . The noise-free game is:  $v_1(12) > v_1(1)$ ;  $v_2(12) > v_2(2)$ . So,  $\pi = \tilde{\pi}$  in this case.
24.  $\alpha(1) = \alpha_2; \alpha(2) = \alpha_1; \alpha(12) = \alpha_1$ . Probability of such alpha's is  $p_1^2 p_2$ . Thus, the actual values are  $v_1(1) = \frac{\tilde{v}_1(1)}{\alpha_2}$ ,  $v_2(2) = \frac{\tilde{v}_2(2)}{\alpha_1}$ ;  $v_1(12) = \frac{\tilde{v}_1(12)}{\alpha_1}$  and  $v_2(12) = \frac{\tilde{v}_2(12)}{\alpha_1}$ . Clearly, the preferences in the noise-free game are not clear; it will depend on the relative values of  $\alpha_1$ ,  $\alpha_2$  and  $\tilde{v}$ . If  $\alpha_1$ ,  $\alpha_2$  and  $\tilde{v}$ 's are such that  $\frac{\tilde{v}_1(12)}{\alpha_1} > \frac{\tilde{v}_1(1)}{\alpha_2}$  then  $\pi = N$  otherwise  $\pi = \{\{1\}, \{2\}\}$ .
25.  $\alpha(1) = \alpha_2; \alpha(2) = \alpha_1; \alpha(12) = \alpha_2$ . Probability of such alpha's is  $p_1 p_2^2$ . Thus, the actual values are  $v_1(1) = \frac{\tilde{v}_1(1)}{\alpha_2}$ ,  $v_2(2) = \frac{\tilde{v}_2(2)}{\alpha_1}$ ;  $v_1(12) = \frac{\tilde{v}_1(12)}{\alpha_2}$  and  $v_2(12) = \frac{\tilde{v}_2(12)}{\alpha_2}$ . Since,  $\frac{\tilde{v}_2(12)}{\alpha_2} > \tilde{v}_2(12) > \tilde{v}_2(2) > \frac{\tilde{v}_2(2)}{\alpha_1}$ . The noise-free game is:  $v_1(12) > v_1(1)$ ;  $v_2(12) > v_2(2)$ . So,  $\pi = \tilde{\pi}$  in this case.
26.  $\alpha(1) = \alpha_2; \alpha(2) = \alpha_2; \alpha(12) = \alpha_1$ . Probability of such alpha's is  $p_1 p_2^2$ . Thus, the actual values are  $v_1(1) = \frac{\tilde{v}_1(1)}{\alpha_2}$ ,  $v_2(2) = \frac{\tilde{v}_2(2)}{\alpha_2}$ ;  $v_1(12) = \frac{\tilde{v}_1(12)}{\alpha_1}$  and  $v_2(12) = \frac{\tilde{v}_2(12)}{\alpha_1}$ . The noise-free game preferences are unclear; it will depend on the relative values  $\alpha_1$ ,

$\alpha_2$  and  $\tilde{v}$ . If  $\alpha_1, \alpha_2$  and  $\tilde{v}$ 's are such that  $\frac{\tilde{v}_1(12)}{\alpha_1} > \frac{\tilde{v}_1(1)}{\alpha_2}$  and  $\frac{\tilde{v}_2(12)}{\alpha_1} > \frac{\tilde{v}_2(2)}{\alpha_2}$  then  $\pi = N$  otherwise  $\pi = \{\{1\}, \{2\}\}$ .

27.  $\alpha(1) = \alpha_2; \alpha(2) = \alpha_2; \alpha(12) = \alpha_2$ . The probability of such alpha is  $p_2^3$ . Thus, the actual values are  $v_1(1) = \frac{\tilde{v}_1(1)}{\alpha_2}$ ,  $v_2(2) = \frac{\tilde{v}_2(2)}{\alpha_2}$ ;  $v_1(12) = \frac{\tilde{v}_1(12)}{\alpha_2}$  and  $v_2(12) = \frac{\tilde{v}_2(12)}{\alpha_2}$ . The noise-free game is:  $v_1(12) > v_1(1)$ ;  $v_2(12) > v_2(2)$ . So,  $\pi = \tilde{\pi}$  in this case.

Since  $\bar{r} = \max \left\{ \frac{\tilde{v}_1(12)}{\tilde{v}_1(1)}, \frac{\tilde{v}_2(12)}{\tilde{v}_2(2)} \right\}$ , and  $\underline{r} = \min \left\{ \frac{\tilde{v}_1(12)}{\tilde{v}_1(1)}, \frac{\tilde{v}_2(12)}{\tilde{v}_2(2)} \right\}$ . From above cases, we see that in 14 out of 27 cases (case 1,3,4,7,8,9,12,13,15,17,21,23,25,27) we have  $\pi = \tilde{\pi} = N$  in noise-free game. In these cases, the relative value of  $\tilde{v}_1(\cdot), \tilde{v}_2(\cdot)$  should satisfy  $\alpha_1 \geq \bar{r}, \frac{1}{\alpha_2} \geq \bar{r}, \frac{\alpha_1}{\alpha_2} \geq \bar{r}$ . The prediction probability in this case is given below as  $g(p_1, p_2)$ . Whereas if we allow for the cases, say  $\alpha_1 < \underline{r}; \frac{1}{\alpha_2} < \underline{r}; \frac{\alpha_1}{\alpha_2} < \underline{r}$ , then the prediction probability is 1. So, these are the two extreme cases. However, if we take any other range of  $\alpha$ 's, the prediction probability will be more than  $g(p_1, p_2)$  and less than 1. Thus,

$$\mathbb{P}[\pi = \tilde{\pi} \mid \text{game 1}] = \begin{cases} g(p_1, p_2), & \text{if } \alpha_1 \geq \bar{r}; \frac{1}{\alpha_2} \geq \bar{r}; \frac{\alpha_1}{\alpha_2} \geq \bar{r} \\ 1, & \text{if } \alpha_1 < \underline{r}; \frac{1}{\alpha_2} < \underline{r}; \frac{\alpha_1}{\alpha_2} < \underline{r}, \end{cases} \quad (20)$$

where  $g(p_1, p_2) = p_1^3 + p_2^3 + 2(p_1(1 - p_1 - p_2))^2 + p_2^2(1 - p_1 - p_2) + p_1p_2(1 - p_1 - p_2) + p_1p_2^2 + p_1^2p_2 + p_1^2(1 - p_1 - p_2) + p_2(1 - p_1 - p_2)^2 + (1 - p_1 - p_2)^3$ . ■

## 5.2. Safety value via global minima for 2 agents and 3 support noise model

Here we will show that the above prediction probability given in Equation (20) can be non-convex in  $p_1, p_2$ . So, the global minima are difficult to hope for.

Note that  $\frac{\partial g(p_1, p_2)}{\partial p_1} = 3p_1^2 - (p_2 - 1)^2$  and  $\frac{\partial g(p_1, p_2)}{\partial p_2} = -2p_1(p_2 - 1) - 3p_2^2 + 6p_2 - 2$ . Hence, we have  $\frac{\partial^2 g(p_1, p_2)}{\partial^2 p_1} = 6p_1$ ,  $\frac{\partial^2 g(p_1, p_2)}{\partial p_1 p_2} = \frac{\partial^2 g(p_1, p_2)}{\partial p_2 p_1} = -2(p_2 - 1)$ , and  $\frac{\partial^2 g(p_1, p_2)}{\partial p_2^2} = -2p_1 - 6p_2 + 6$ . Thus, the Hessian of  $g(p_1, p_2)$  is

$$H(g(p_1, p_2)) = \begin{bmatrix} 6p_1 & -2(p_2 - 1) \\ -2(p_2 - 1) & -2p_1 - 6p_2 + 6 \end{bmatrix}.$$

For  $p_1 = 0.3$  and  $p_2 = 0.5$ , we have

$$H(g(p_1, p_2)) = \begin{bmatrix} 0.18 & 1 \\ 1 & 2.4 \end{bmatrix}.$$

The eigenvalues are  $\lambda_1 = 2.78$ , and  $\lambda_2 = -0.20$ . So,  $g(p_1, p_2)$  is not a convex function. Therefore, finding the global minima is difficult.

Though the above prediction probability is non-convex, one can get the noise set such that the prediction probability is more than a given satisfaction  $\zeta$ . Similar to the 2 support cases, where the prediction probability was a convex function, but the noise regimes were disjoint intervals, in 3 support cases also, we get disjoint sets. However, computing the exact safety value is problematic because it is the global minima of the non-convex prediction

probability function. Note that the safety value is a fundamental limit such that below a user-given satisfaction  $\zeta$ , the partition is noise robust in the entire noise probability simplex.

As earlier, in the noise regimes where the prediction probability is more than  $\zeta$ , a partition  $\tilde{\pi}$  that is core-stable in a noisy game will remain core-stable in a noise-free game.
